# Supplementary material for: Triage and resuscitation tools for low and middle income countries: how to catch the killer?
Source: HighWire-hosted journal article supplement (doi:10.1136/archdischild-2021-321981), 2021-06-10
Supplement: archdischild-2021-321981supp003_data_supplement.pdf [file archdischild-2021-321981supp003_data_supplement.pdf]

**PREM Chart**

| Individual variables                                                                                                                                                                                                                                                                                                            | Airway                                                      | Breathing                                                            | Circulation                                                                                                                                               | Disability                                                                                                                                                                                                                                                                                                                                     |
|---------------------------------------------------------------------------------------------------------------------------------------------------------------------------------------------------------------------------------------------------------------------------------------------------------------------------------|-------------------------------------------------------------|----------------------------------------------------------------------|-----------------------------------------------------------------------------------------------------------------------------------------------------------|------------------------------------------------------------------------------------------------------------------------------------------------------------------------------------------------------------------------------------------------------------------------------------------------------------------------------------------------|
|                                                                                                                                                                                                                                                                                                                                 | Stable:<br>Voice or cry                                     | RR for age:<br>1. Increased<br>2. Normal<br>3. Decreased<br>4. Apnea | HR for age:<br>1. Increased<br>2. Normal<br>3. Decreased (relative bradycardia)<br>4. Bradycardia<br>Heart sounds:<br>Muffled: Yes/ No<br>Gallop: Yes/ No | A: Alert (Carer confirms)<br>V: Responsive to voice<br>Carer reports incessant cry, lethargy, more-sleepy, not as usual (but you feel child is "conscious" although not fully alert)<br>P: Responsive to pain. Include here children unable to sit or stand/normally ambulant child carried into hospital/ posturing/floppy<br>U: Unresponsive |
|                                                                                                                                                                                                                                                                                                                                 | Unstable:<br>No voice (un-responsive victim, not breathing) | Retractions:<br>1. Yes<br>2. No                                      | Femoral pulse vs dorsalis pedis:<br>(Table 1: Pulses)<br>1. +++/+<br>2. +++/+++<br>3. +++/0<br>4. ++/0                                                    | Eye position/ movements:<br>Mid-position/Conjugate deviation<br>1. Nystagmus: Yes/No<br>2. Lid twitch: Yes/No<br>3. Looks around (EOM-Normal): Yes/No<br>4. Dolls eye movement: Yes/No                                                                                                                                                         |
|                                                                                                                                                                                                                                                                                                                                 | Obstructed:<br>(Stridor)<br>(Noise during every breath)     | Grunt:<br>1. Yes<br>2. No                                            | Core peripheral temperature gap<br>1. Warm throughout<br>2. Cool below ankle<br>3. Cool below knee<br>4. Cool below thigh                                 | Pupils<br>1. Equal/ unequal<br>2. Response to light: brisk/ sluggish                                                                                                                                                                                                                                                                           |
|                                                                                                                                                                                                                                                                                                                                 | Stable<br>obstructed:<br>(Voice with added noise)           | Type of respiration:<br>1. Thoracic<br>2. Abdominal                  | Color:<br>1. Flushed<br>2. Abnormal<br>3. Normal                                                                                                          | GTC (Generalized Tonic Convulsions)<br>1. Yes<br>2. No                                                                                                                                                                                                                                                                                         |
|                                                                                                                                                                                                                                                                                                                                 | Endotracheal Tube (ET)                                      | Bilateral air-entry:<br>1. Yes<br>2. No                              | CRT (capillary refill time):<br>< 2 seconds<br>< 1 second<br>> 2 seconds                                                                                  | Tone and posture<br>1. Normal<br>2. Abnormal                                                                                                                                                                                                                                                                                                   |
|                                                                                                                                                                                                                                                                                                                                 | Tracheostomy                                                | Crept/wheeze: Yes/ No                                                | Hepatomegaly<br>(Table 2: Liver span):<br>1. Yes<br>2. No                                                                                                 |                                                                                                                                                                                                                                                                                                                                                |
|                                                                                                                                                                                                                                                                                                                                 |                                                             |                                                                      | Systolic BP (SBP) for age:<br>Normal<br>High<br>Low                                                                                                       |                                                                                                                                                                                                                                                                                                                                                |
|                                                                                                                                                                                                                                                                                                                                 |                                                             |                                                                      | Diastolic BP (DBP):<br>1. < 50% of SBP<br>2. > 50% of SBP                                                                                                 |                                                                                                                                                                                                                                                                                                                                                |
|                                                                                                                                                                                                                                                                                                                                 |                                                             |                                                                      | Pulse pressure:<br>40<br>< 40<br>>40                                                                                                                      |                                                                                                                                                                                                                                                                                                                                                |
|                                                                                                                                                                                                                                                                                                                                 |                                                             |                                                                      | MAP Mean Arterial Pressure):<br>Normal<br>High<br>Low                                                                                                     |                                                                                                                                                                                                                                                                                                                                                |
| INFERENCE                                                                                                                                                                                                                                                                                                                       | <b>Airway</b>                                               | <b>Breathing</b>                                                     | <b>Circulation</b>                                                                                                                                        | <b>Disability</b>                                                                                                                                                                                                                                                                                                                              |
|                                                                                                                                                                                                                                                                                                                                 | 1. Stable                                                   | 1. Normal                                                            | 1. HR: Normal/tachycardia/<br>Relative bradycardia/<br>Absolute bradycardia                                                                               | 1. Alert                                                                                                                                                                                                                                                                                                                                       |
|                                                                                                                                                                                                                                                                                                                                 | 2. Unstable                                                 | 2. Effortless tachypnea                                              | 2. Perfusion: shock/ no shock                                                                                                                             | 2. ALC (altered level of consciousness)                                                                                                                                                                                                                                                                                                        |
|                                                                                                                                                                                                                                                                                                                                 | 3. Obstructed                                               | 3. Respiratory distress                                              | 3. Hepatomegaly: Yes/ No                                                                                                                                  | 3. Non-convulsive status epilepticus/ Subtle status epilepticus                                                                                                                                                                                                                                                                                |
|                                                                                                                                                                                                                                                                                                                                 | 4. Stable obstructed                                        | 4. Impending Respiratory failure                                     | 4. Cardiogenic shock: Yes/No                                                                                                                              | 4. ICP (intracranial pressure)                                                                                                                                                                                                                                                                                                                 |
|                                                                                                                                                                                                                                                                                                                                 | 5. Unstable obstructed                                      | 5. Bradypnea                                                         | 5. SBP: High/normal/ low                                                                                                                                  |                                                                                                                                                                                                                                                                                                                                                |
|                                                                                                                                                                                                                                                                                                                                 | 6. ET/Trach                                                 | 6. Apnea                                                             | 6. Pulse pressure: Normal/<br>wide/ narrow<br>7. MAP: Normal/ high/ low                                                                                   |                                                                                                                                                                                                                                                                                                                                                |
| <i>HR, Heart Rate; RR, Respiratory Rate; BP, Blood Pressure; EOM, Extra-ocular Movements</i>                                                                                                                                                                                                                                    |                                                             |                                                                      |                                                                                                                                                           |                                                                                                                                                                                                                                                                                                                                                |
| <i>Adapted from National Health Mission-Strengthening of Pediatric Emergency Care System in Tamil Nadu-Establishment of Pediatric Resuscitation and Emergency Units under Tamil Nadu Accidents and Emergency Care Initiative under the name of PREM G.O(D)No. 539, Department of Health and Family Welfare, dated 30.11.19.</i> |                                                             |                                                                      |                                                                                                                                                           |                                                                                                                                                                                                                                                                                                                                                |

Table 1: Interpretation of concurrently palpated pulses

| Femoral pulse | Dorsalis Pedis | Inference                                        |
|---------------|----------------|--------------------------------------------------|
| +++           | ++             | Normal                                           |
| +++           | +++            | Vasodilation (suggestive of warm shock)          |
| +++           | +              | Narrow pulse pressure (suggestive of cold shock) |
| +++           | 0              | Hypotensive shock                                |
| + or 0        | 0              | Cardiac arrest                                   |

Table 2: Approximate normal liver span of infants and children

| Age      | Liver span (cm) |
|----------|-----------------|
| Birth    | 5.6-5.9         |
| 2 months | 5               |
| 1 year   | 6               |
| 2 years  | 6.5             |
| 3 years  | 7               |
| 4 years  | 7.5             |
| 5 years  | 8               |
| 12 years | 9               |

Adapted from: Naveh Y, Berant M. Assessment of liver size in normal infants and children. *J Pediatr Gastroenterol Nutr.* 1984;3(3):346-8.
